# Supplementary material for: St. John’s Wort Suppresses Growth in Triple-Negative Breast Cancer Cell Line MDA-MB-231 by Inducing Prodeath Autophagy and Apoptosis
Source: MDPI journal article supplement (doi:10.3390/nu12103175), 2020-10-17
Supplement: s1 [file s1]

## Supplemental Information

### St. John's Wort suppresses the growth of triple-negative breast cancer cell line MDA-MB-231 by inducing inducing pro-death autophagy and apoptosis

Mi-Kyoung You <sup>1</sup>, Young-Hyun Lee<sup>2</sup>, Hwa-Jin Kim<sup>2</sup>, Ji Hyun Kook <sup>2</sup>, Hyeon-A Kim <sup>2\*</sup>

<sup>1</sup> Department of Nutrition, University of Massachusetts Amherst, Amherst, MA,01003, USA

<sup>2</sup> Department of Food and Nutrition, Mokpo National University, Jeollanam-do, 58554, Republic of Korea

#### Supplemental Figures

**Figure S1.** SJWE with 3-MA for 3 days decreased proliferation in TNBC line MDA-MB-231 cells.

**Figure S2.** SJWE increased p-AMPK expression in TNBC line MDA-MB-231 cells.

#### Supplemental Tables

**Table S1.** List of primary antibodies

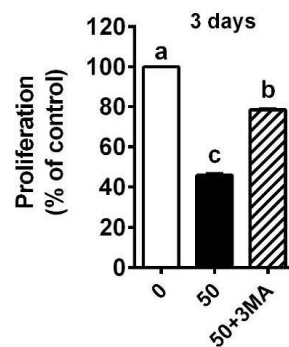

**Figure S1.** SJWE with 3-MA for 3 days decreased proliferation in TNBC line MDA-MB-231 cells. MDA-MB-231 cells were treated with 50 µg/mL SJWE for 3 days with or without autophagy inhibitor (3-MA, 1mM). C: DMSO (0.1% final concentration); SJWE 50: St. John's Wort ethanol extract 50 µg /mL; SJWE 50+3MA: St. John's Wort ethanol extract 50 µg /mL with 3-MA treatment. Different letters are significantly different by Duncan's multiple range test ( $P < 0.05$ ).

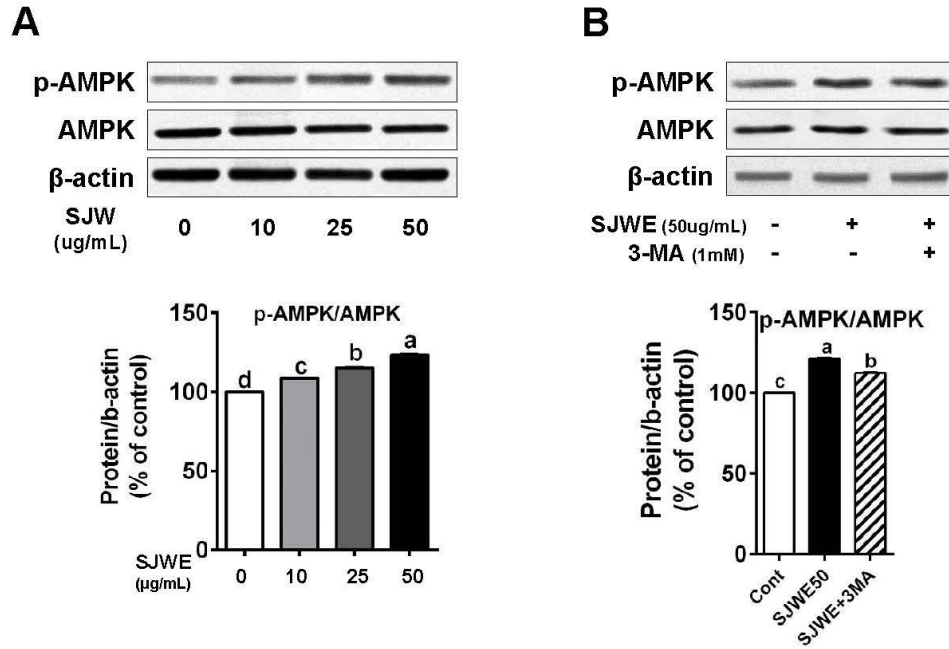

**Figure S2. SJWE increased p-AMPK expression in TNBC line MDA-MB-231 cells.** (A) MDA-MB-231 cells were treated with SJWE for 24 hours. Western blot analysis of p-AMPK and AMPK, (B) MDA-MB-231 cells were treated with SJWE for 24 hours with or without autophagy inhibitor (3-MA, 1mM). Western blot analysis of p-AMPK and AMPK.

**Table 1.** List of primary antibodies.

| Antibody                       | Host   | Dilution | Company                  | Catalog no. |
|--------------------------------|--------|----------|--------------------------|-------------|
| LC3                            | Rabbit | 1:1000   | Cell Signaling           | 2775        |
| p62                            | Rabbit | 1:1000   | Cell Signaling           | 23214       |
| Atg3                           | Rabbit | 1:1000   | Cell Signaling           | 3415        |
| Atg5                           | Rabbit | 1:1000   | Cell Signaling           | 12994       |
| Atg5-12                        | Rabbit | 1:1000   | Cell Signaling           | 4180        |
| Beclin 1                       | Rabbit | 1:1000   | Cell Signaling           | 3495        |
| PI3K p85                       | Rabbit | 1:1000   | Cell Signaling           | 4292        |
| p-PI3K p85(Tyr458)/p55(Tyr199) | Rabbit | 1:1000   | Cell Signaling           | 4228        |
| Akt                            | Rabbit | 1:1000   | Cell Signaling           | 9272        |
| p-Akt                          | Rabbit | 1:1000   | Cell Signaling           | 9271        |
| Bcl-2                          | Rabbit | 1:1000   | Cell Signaling           | 2870        |
| Bcl-xL                         | Rabbit | 1:1000   | Cell Signaling           | 2762        |
| Bad                            | Rabbit | 1:1000   | Cell Signaling           | 9292        |
| p-Bad                          | Rabbit | 1:1000   | Cell Signaling           | 9291        |
| Bax                            | Rabbit | 1:1000   | Cell Signaling           | 2772        |
| mTOR                           | Rabbit | 1:1000   | Cell Signaling           | 2983        |
| p-mTOR                         | Rabbit | 1:1000   | Cell Signaling           | 5536        |
| AMPK                           | Rabbit | 1:1000   | Cell Signaling           | 2532        |
| p-AMPK                         | Rabbit | 1:1000   | Cell Signaling           | 23535       |
| $\beta$ -actin                 | Mouse  | 1:1000   | Santa Cruz Biotechnology | sc-47778    |
